# Supplementary material for: Sustainable biodiesel synthesis via non-catalytic transesterification of biomass waste-derived oil and ethanol
Source: Royal Society of Chemistry journal article supplement (doi:10.1039/d5gc02712h), 2025-01-01
Supplement: d5gc02712h1.pdf [file d5gc02712h1.pdf]

## **Supplementary Materials**

### **Sustainable biodiesel synthesis via non-catalytic transesterification of biomass waste-derived oil and ethanol**

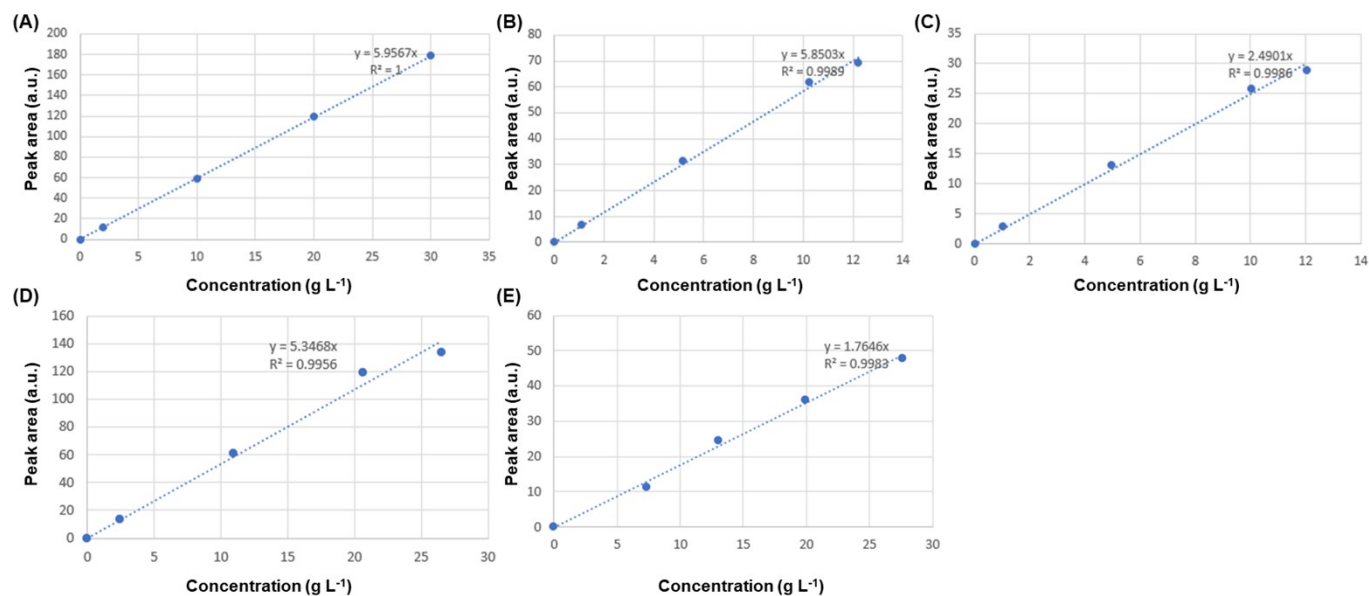

**Figure S1.** Standard curves of (A) glucose, (B) xylose, (C) ethanol (EtOH), (D) arabinose, and (E) cellobiose

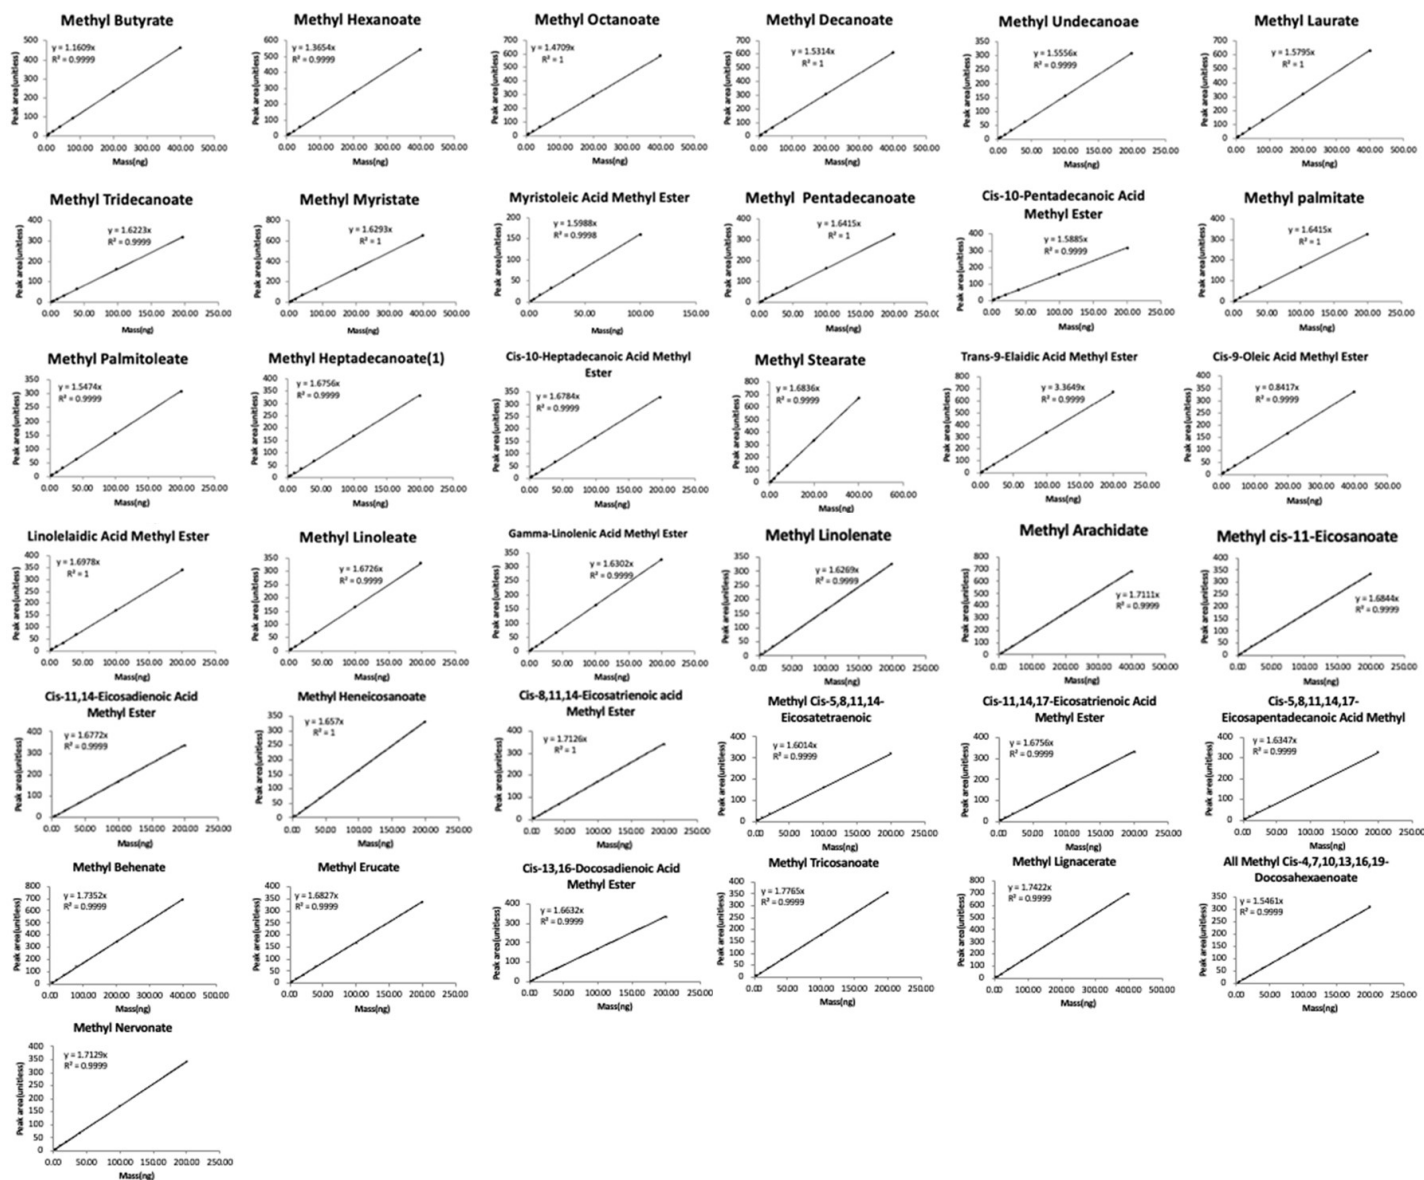

Figure S2. Standard curves of FAME mix

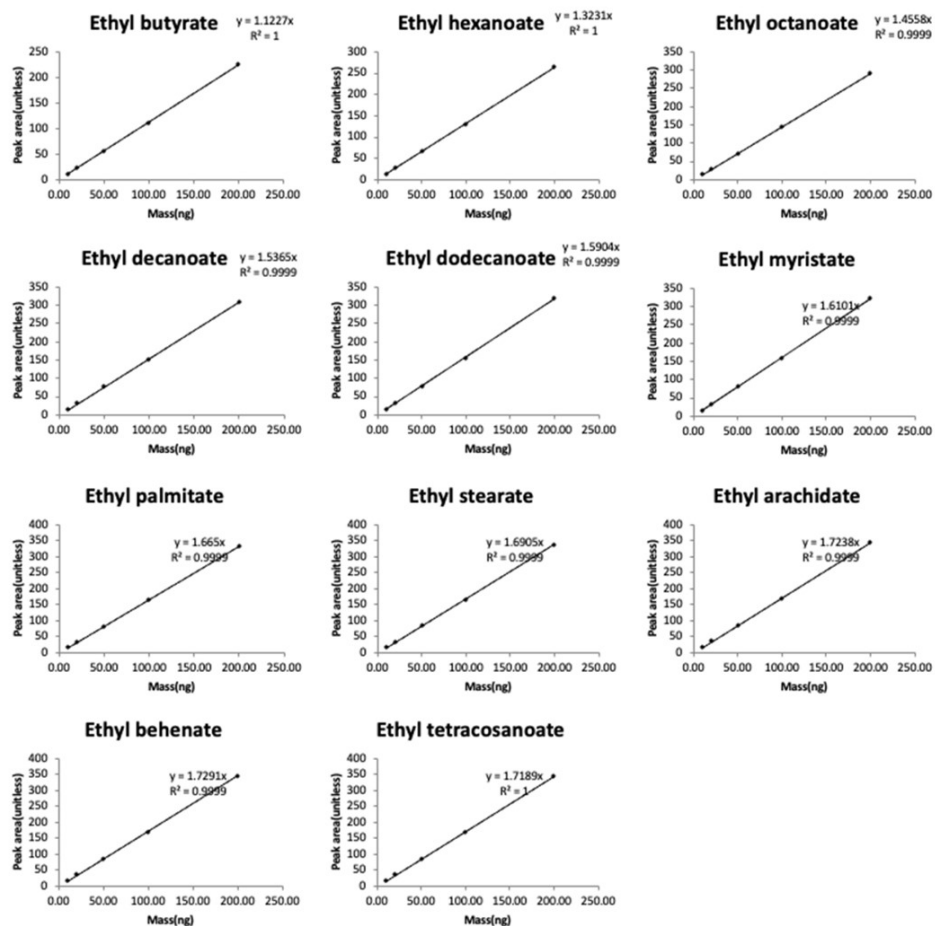

Figure S3. Standard curves of FAEE mix

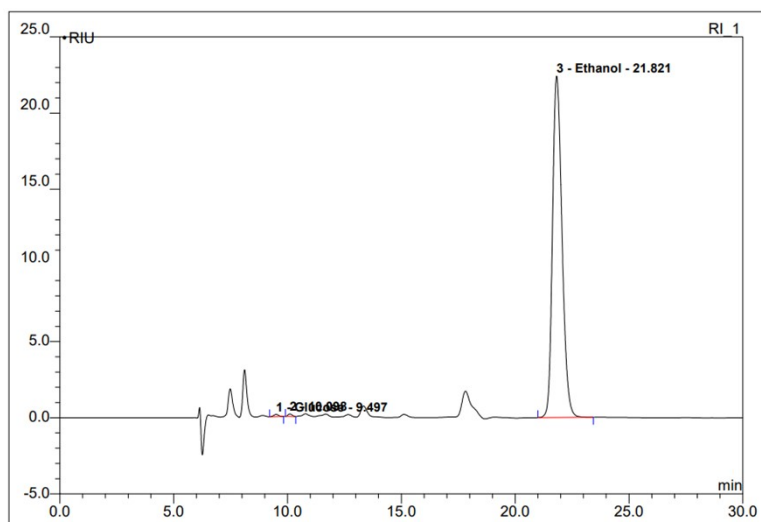

**Figure S4.** HPLC spectrum of silkworm litter hydrolysate after *P. stipitis* fermentation

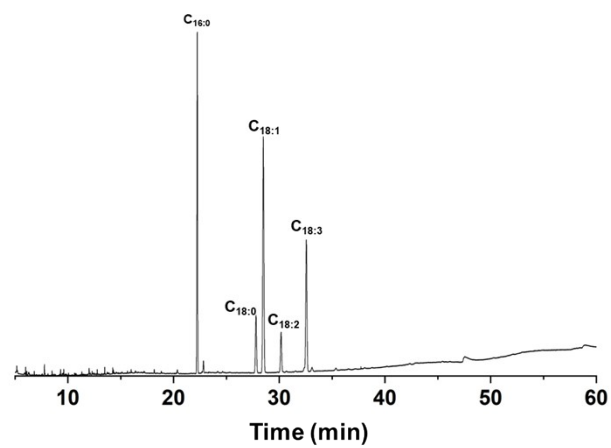

**Figure S5.** GC/mass spectrometer spectrum of FAME produced using silkworm pupae oil through non-catalytic transesterification

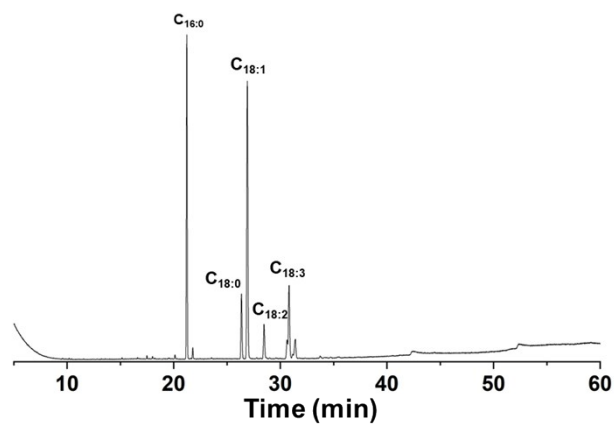

**Figure S6.** GC/mass spectrometer spectrum of FAEE produced using silkworm pupae oil through non-catalytic transesterification
